# Supplementary material for: Detection of pup odors by non-canonical adult vomeronasal neurons expressing an odorant receptor gene is influenced by sex and parenting status
Source: PubMed Central journal article supplement (PMC4753656; doi:10.1186/s12915-016-0234-9), 2016-02-15

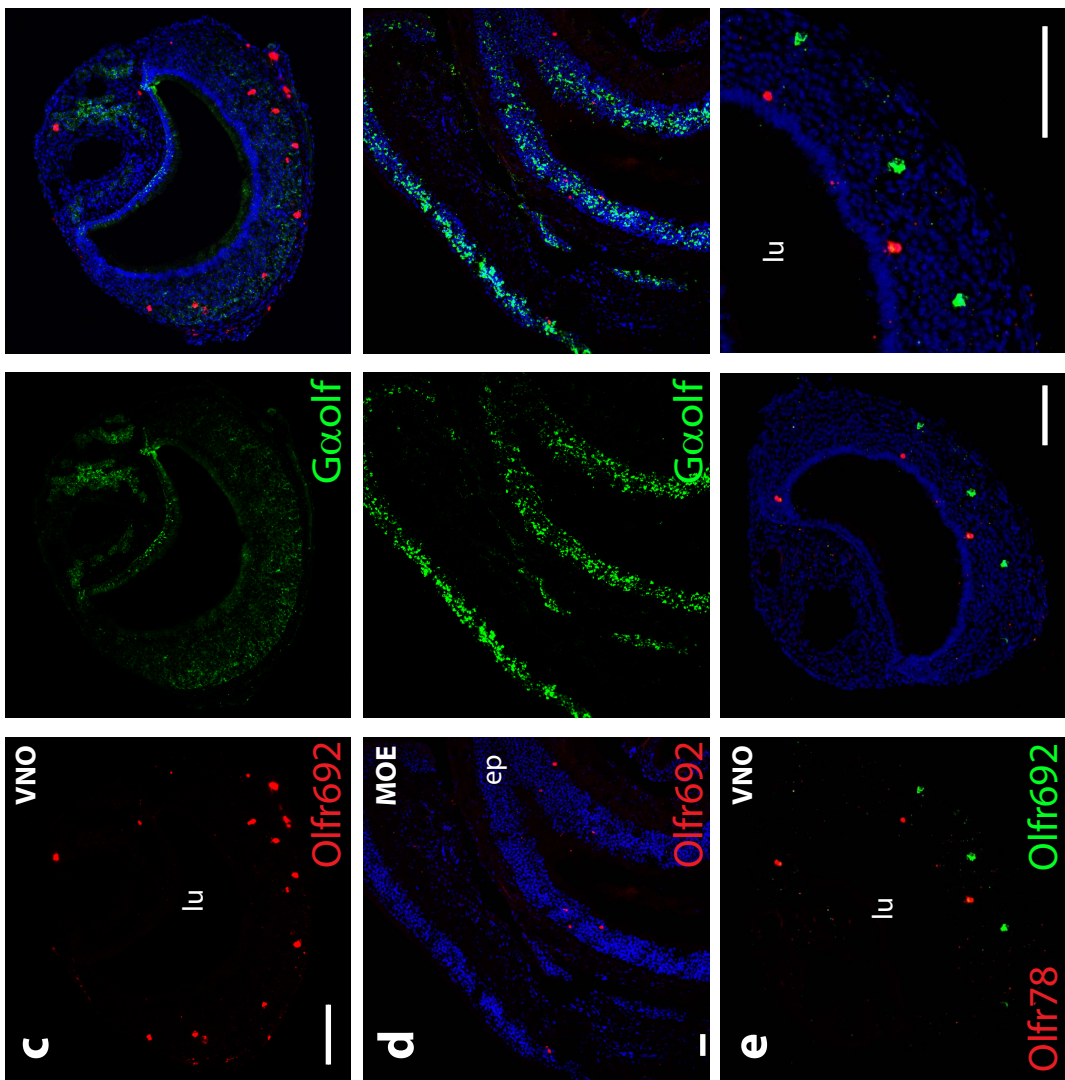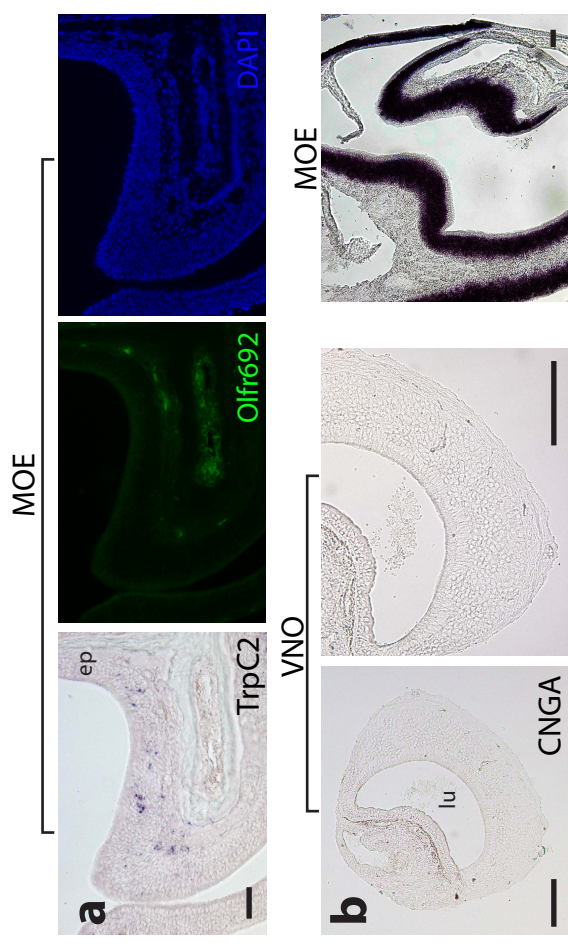

Supplement: 12915_2016_234_MOESM3_ESM.pdf [file 12915_2016_234_MOESM3_ESM.pdf]
